# Supplementary material for: Energy consumption of agitators in activated sludge tanks – actual state and optimization potential
Source: Oxford University Press journal article supplement (doi:10.2166/wst.2017.596), 2017-11-23
Supplement: wst2017596supp.xls [file wst2017596supp.xls]

## Sheet: QUESTIONNAIRE
	Questionnaire on agitators in activated sludge tanks
	Please complete and send back to: k.fuereder@iwag.tuwien.ac.at
		General Questions
	A	Name of the WWTP
	B	KAN-number (internal registration number)
	C	Design capacity			PE120
	D	Daily influent COD-load (yearly average for the year 2013)			kg COD/d
	E	Primary sedimentation tank - YES/NO?		to be selected
	F	Total volume of all activated sludge tanks (all aerated and unaerated tanks)			m³
	G	Sludge volume index (lowest monthly average)			mL/g
	H	Type of denitrification?		to be selected
	I	Tank for biological P-removal - YES/NO?		to be selected
	J	Yearly energy consumption of MBWWT (operator data, year 2013)			kWh/a
	K	Yearly energy consumption of all agitators within MBWWT (year 2013)			kWh/a
	L	Sum of nominal power of all agitators within MBWWT			kW
	M	Number of tank types (if > 4 please complete 2 questionnaires)			-
		TANK TYPE 1
	B1-1	Name of the tank type
	B1-2	Number of tanks			-
	B1-3	Effective water volume per tank (if SBR-system: do not enter anything)			m³
	B1-3-1	Max. water volume per tank (only enter for SBR-systems)			m³
	B1-3-2	Min. water volume per tank (only enter for SBR-systems)			m³
	B1-4	Tank depth (= water level); (if SBR-system: do not enter anything)			m
	B1-4-1	Max. tank depth (only enter for SBR-systems)			m
	B1-4-2	Min. tank depth (only enter for SBR-systems)			m
	B1-5	Tank geometry?		to be selected
	B1-6	Aerated or unaerated tank?		to be selected
	B1-7	Type of aeration? (omit if B1-6 = "unaerated tank")		to be selected
	B1-8	Aeration runs continuously / intermittently? (omit if B1-6 = "unaerated tank")		to be selected
	B1-9	Are there agitators in the tank - YES / NO?		to be selected
	B1-10	Number of agitators per tank			-
	B1-11	Type of agitator?		to be selected
	B1-12	Model name and manufacturer of agitators (several entries possible)
	B1-13	Nominal capacity per agitator (only if all agitators in the basin have the same nominal capacity)			kW
	B1-14	Sum of nominal power of all agitators within a tank			kW
	B1-15	Sum of power consumption of all agitators within a tank			kW
	B1-16	Daily average runtime of agitators (if known)			h/d
	B1-17	If daily average runtime (B1-16) is not known, then please estimate it here:			h/d
	B1-18	Are agitators turned off during aeration? (omit if B1-6 = "unaerated tank")		to be selected
	B1-19	Are agitators turned off partially during aeration? (omit if B1-6 = "unaerated tank")		to be selected
	B1-20	Tank deposits on the tank floor?		to be selected
	B1-21	Do agitators get entwined?		to be selected
	B1-22	Propeller-thrust of agitator [N] (if known)			N
	B1-23	Notes on specific characteristics of tank type …
		TANK TYPE 2
	B2-1	Name of the tank type
	B2-2	Number of tanks			-
	B2-3	Effective water volume per tank (if SBR-system: do not enter anything)			m³
	B2-3-1	Max.water volume per tank (only enter for SBR-systems)			m³
	B2-3-2	Min. water volume per tank (only enter for SBR-systems)			m³
	B2-4	Tank depth (= water level); (if SBR-system: do not enter anything)			m
	B2-4-1	Max. tank depth (only enter for SBR-systems)			m
	B2-4-2	Min. tank depth (only enter for SBR-systems)			m
	B2-5	Tank geometry?		to be selected
	B2-6	Aerated or unaerated tank?		to be selected
	B2-7	Type of aeration? (omit if B1-6 = "unaerated tank")		to be selected
	B2-8	Aeration runs continuously / intermittently? (omit if B1-6 = "unaerated tank")		to be selected
	B2-9	Are there agitators in the tank - YES / NO?		to be selected
	B2-10	Number of agitators per tank			-
	B2-11	Type of agitator?		to be selected
	B2-12	Model name and manufacturer of agitators (several entries possible)
	B2-13	Nominal capacity per agitator (only if all agitators in the basin have the same nominal capacity)			kW
	B2-14	Sum of nominal power of all agitators within a tank			kW
	B2-15	Sum of power consumption of all agitators within a tank			kW
	B2-16	Daily average runtime of agitators (if known)			h/d
	B2-17	If daily average runtime (B1-16) is not known, then please estimate it here:			h/d
	B2-18	Are agitators turned off during aeration? (omit if B1-6 = "unaerated tank")		to be selected
	B2-19	Are agitators turned off partially during aeration? (omit if B1-6 = "unaerated tank")		to be selected
	B2-20	Tank deposits on the tank floor?		to be selected
	B2-21	Do agitators get entwined?		to be selected
	B2-22	Propeller-thrust of agitator [N] (if known)			N
	B2-23	Notes on specific characteristics of tank type …
		TANK TYPE 3
	B3-1	Name of the tank type
	B3-2	Number of tanks			-
	B3-3	Effective water volume per tank (if SBR-system: do not enter anything)			m³
	B3-3-1	Max.water volume per tank (only enter for SBR-systems)			m³
	B3-3-2	Min. water volume per tank (only enter for SBR-systems)			m³
	B3-4	Tank depth (= water level); (if SBR-system: do not enter anything)			m
	B3-4-1	Max. tank depth (only enter for SBR-systems)			m
	B3-4-2	Min. tank depth (only enter for SBR-systems)			m
	B3-5	Tank geometry?		to be selected
	B3-6	Aerated or unaerated tank?		to be selected
	B3-7	Type of aeration? (omit if B1-6 = "unaerated tank")		to be selected
	B3-8	Aeration runs continuously / intermittently? (omit if B1-6 = "unaerated tank")		to be selected
	B3-9	Are there agitators in the tank - YES / NO?		to be selected
	B3-10	Number of agitators per tank			-
	B3-11	Type of agitator?		to be selected
	B3-12	Model name and manufacturer of agitators (several entries possible)
	B3-13	Nominal capacity per agitator (only if all agitators in the basin have the same nominal capacity)			kW
	B3-14	Sum of nominal power of all agitators within a tank			kW
	B3-15	Sum of power consumption of all agitators within a tank			kW
	B3-16	Daily average runtime of agitators (if known)			h/d
	B3-17	If daily average runtime (B1-16) is not known, then please estimate it here:			h/d
	B3-18	Are agitators turned off during aeration? (omit if B1-6 = "unaerated tank")		to be selected
	B3-19	Are agitators turned off partially during aeration? (omit if B1-6 = "unaerated tank")		to be selected
	B3-20	Tank deposits on the tank floor?		to be selected
	B3-21	Do agitators get entwined?		to be selected
	B3-22	Propeller-thrust of agitator [N] (if known)			N
	B3-23	Notes on specific characteristics of tank type …
		TANK TYPE 4
	B4-1	Name of the tank type
	B4-2	Number of tanks			-
	B4-3	Effective water volume per tank (if SBR-system: do not enter anything)			m³
	B4-3-1	Max.water volume per tank (only enter for SBR-systems)			m³
	B4-3-2	Min. water volume per tank (only enter for SBR-systems)			m³
	B4-4	Tank depth (= water level); (if SBR-system: do not enter anything)			m
	B4-4-1	Max. tank depth (only enter for SBR-systems)			m
	B4-4-2	Min. tank depth (only enter for SBR-systems)			m
	B4-5	Tank geometry?		to be selected
	B4-6	Aerated or unaerated tank?		to be selected
	B4-7	Type of aeration? (omit if B1-6 = "unaerated tank")		to be selected
	B4-8	Aeration runs continuously / intermittently? (omit if B1-6 = "unaerated tank")		to be selected
	B4-9	Are there agitators in the tank - YES / NO?		to be selected
	B4-10	Number of agitators per tank			-
	B4-11	Type of agitator?		to be selected
	B4-12	Model name and manufacturer of agitators (several entries possible)
	B4-13	Nominal capacity per agitator (only if all agitators in the basin have the same nominal capacity)			kW
	B4-14	Sum of nominal power of all agitators within a tank			kW
	B4-15	Sum of power consumption of all agitators within a tank			kW
	B4-16	Daily average runtime of agitators (if known)			h/d
	B4-17	If daily average runtime (B1-16) is not known, then please estimate it here:			h/d
	B4-18	Are agitators turned off during aeration? (omit if B1-6 = "unaerated tank")		to be selected
	B4-19	Are agitators turned off partially during aeration? (omit if B1-6 = "unaerated tank")		to be selected
	B4-20	Tank deposits on the tank floor?		to be selected
	B4-21	Do agitators get entwined?		to be selected
	B4-22	Propeller-thrust of agitator [N] (if known)			N
	B4-23	Notes on specific characteristics of tank type …
		CONTACT
	C1	Name
	C2	Email
	C3	Telephone number

## Sheet: agitator types
Question Bx-11: Type of agitator?
horizontal drive shaft: slow running propeller	horizontal drive shaft: fast running propeller	vertical drive shaft: slow running propeller	vertical drive shaft: hyperboloid-shaped mixer	combined system for aeration and agitation
